# Supplementary material for: Electronic and magnetic properties of a black phosphorene/Tl2S heterostructure with transition metal atom intercalation: a first-principles study
Source: Royal Society of Chemistry journal article supplement (doi:10.1039/c9ra03547h), 2019-01-01
Supplement: c9ra03547h1.pdf [file c9ra03547h1.pdf]

Electronic Supplementary Information

## Electronic, magnetic properties of black phosphorene/Tl<sub>2</sub>S heterostructure with transition metal atoms intercalation: a first-principles study

Yusheng Wang<sup>\*a,c</sup>, Xiaoyan Song<sup>a</sup>, Nahong Song<sup>b,c</sup>, Tianjie Zhang<sup>a</sup>, Xiaohui Yang<sup>a</sup>,

Weifen Jiang<sup>a</sup>, Jianjun Wang<sup>d</sup>

<sup>a</sup> College of Physics and Electronics, North China University of Water Resources and Electric Power, Zhengzhou, Henan, 450046, China

<sup>b</sup> College of Computer and Information Engineering, Henan University of Economics and Law, Zhengzhou, Henan, 450000, China

<sup>c</sup> International Joint Research Laboratory for Quantum Functional Materials of Henan, and School of Physics and Engineering, Zhengzhou University, Zhengzhou 450001, China

<sup>d</sup> College of Science, Zhongyuan University of Technology, Zhengzhou 450007, China

Corresponding author: wangyusheng@ncwu.edu.cn

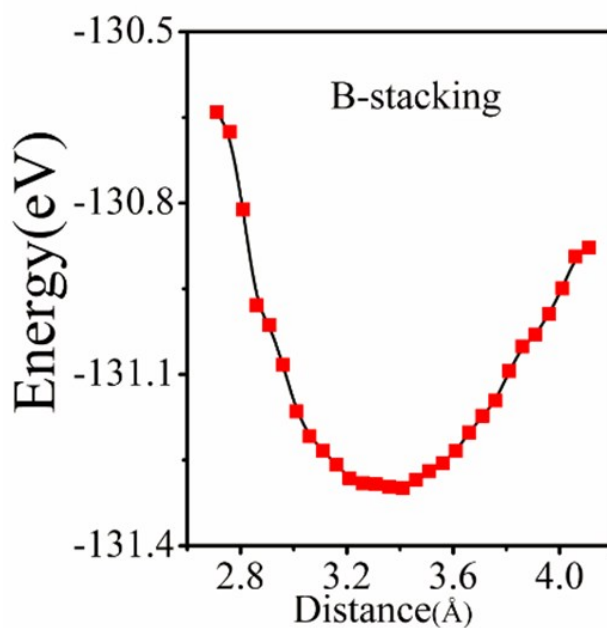

Fig. S1. The total energies as a function of the distance between black phosphorene and Tl<sub>2</sub>S of BP/Tl<sub>2</sub>S.

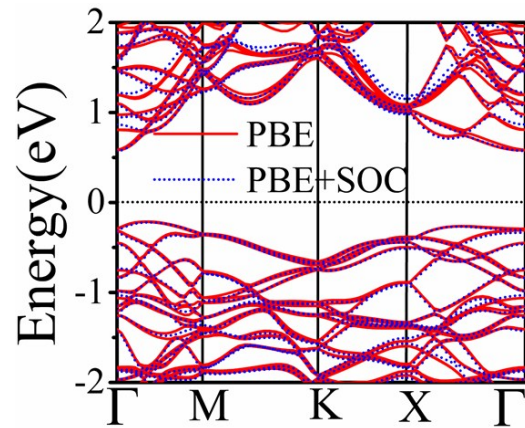

Fig. S2. Band structures for BP/Tl<sub>2</sub>S heterostructure with and without SOC effect.

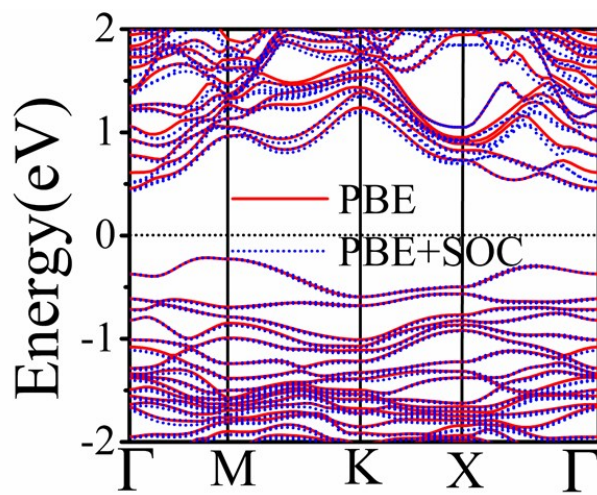

Fig. S3. Band structure for Ni-BP/Tl<sub>2</sub>S with and without SOC effect.

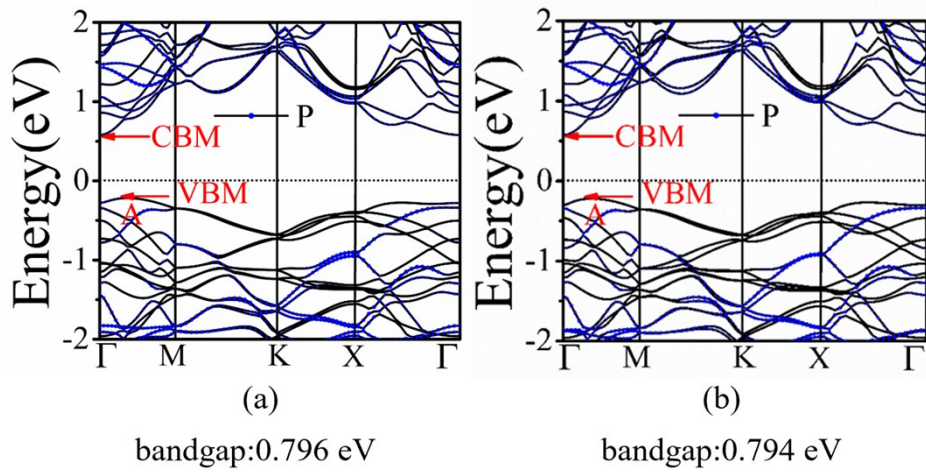

Fig. S4. Band structures for BP/Tl<sub>2</sub>S (a) A-stacking, (b) B-stacking
